# Supplementary material
Source: PubMed Central journal article supplement (PMC6821581)
Supplement: NIHMS1052775-supplement-1.pdf [file NIHMS1052775-supplement-1.pdf]

**SUPPLEMENTAL TABLE 1****Sample collection method and adverse pregnancy outcomes**

| <b>Study</b>                | <b>Tissue collection</b>                                                                                   | <b>Comparison</b>                                                                                                                                          |
|-----------------------------|------------------------------------------------------------------------------------------------------------|------------------------------------------------------------------------------------------------------------------------------------------------------------|
| Antony et al <sup>59</sup>  | Discard placental membranes and maternal decidua; collection 4 cm from cord insertion site                 | Term gestation, no excess gestational weight gain vs PTB with excess gestational weight gain                                                               |
| Aagaard et al <sup>57</sup> | Discard placental membranes and maternal decidua; collection 4 cm from cord insertion site                 | Placental microbiome associated with term birthweight compared with PTB placentas and nonpregnant oral microbiome reported within Human Microbiome Project |
| Prince et al <sup>58</sup>  | Swabs from fetal chorion and/or villous placental membranes adjacent to fetal side, avoiding maternal side | Term birth placenta with and without chorioamnionitis vs PTB placentas with and without chorioamnionitis                                                   |
| Zheng et al <sup>61</sup>   | Discard placental membranes and maternal decidua; collection 4 cm from cord insertion site                 | Full-term infants; normal vs LBW                                                                                                                           |

LBW, low birthweight; PTB, preterm birth.

Fischer. Placental colonization with periodontal pathogens: the potential missing link. *Am J Obstet Gynecol* 2019.

## SUPPLEMENTAL TABLE 2

## Changes in placental microbiome in association with APOs as compared with normal for gestational weight term births

| Components of the microbiome             | LBW <sup>61</sup>       | PTB <sup>57,58,a,b</sup> PTB with excess gestational weight gain <sup>59,c</sup> |
|------------------------------------------|-------------------------|----------------------------------------------------------------------------------|
| Phylum                                   |                         |                                                                                  |
| <i>Actinobacteria</i>                    | ↑                       | Specific order reported <sup>a</sup><br>Phylum reported <sup>c</sup>             |
| <i>Bacteroidetes</i>                     | Specific genus reported | NR                                                                               |
| <i>Cyanobacteria</i>                     | ↓                       | Specific genus reported <sup>a</sup><br>Phylum reported <sup>c</sup>             |
| <i>Firmicutes</i>                        | ↓                       | Specific species reported <sup>a</sup><br>Phylum reported <sup>c</sup>           |
| <i>Fusobacteria</i>                      | ↑                       | Specific genus reported <sup>a</sup>                                             |
| <i>Proteobacteria</i>                    | ↑                       | Specific class or genus reported <sup>a,c</sup>                                  |
| Class                                    |                         |                                                                                  |
| Phylum Proteobacteria                    |                         |                                                                                  |
| Class Alphaproteobacteria                | NR                      | ↑ <sup>a</sup>                                                                   |
| Order                                    |                         |                                                                                  |
| Phylum Actinobacteria                    |                         |                                                                                  |
| Order Actinomycetales                    | NR                      | ↑                                                                                |
| Genus                                    |                         |                                                                                  |
| Phylum Bacteroidetes                     |                         |                                                                                  |
| Genus <i>Shingobacterium</i>             | ↑                       | NR                                                                               |
| Phylum Cyanobacteria                     |                         |                                                                                  |
| Genus <i>Cyanobacteria_unclassified</i>  | ↓                       | NR                                                                               |
| Genus <i>Cyanobacteria_norank</i>        | ↓                       | NR                                                                               |
| Phylum Firmicutes                        |                         |                                                                                  |
| Genus <i>Paenibacillus</i>               | NR                      | ↑                                                                                |
| Genus <i>Lactococcus</i>                 | ↑                       | NR                                                                               |
| Genus <i>Bacillus</i>                    | ↑                       | NR                                                                               |
| Genus <i>Megasphaera</i>                 | ↑                       | NR                                                                               |
| Genus <i>Faecalibacterium</i>            | ↑                       | NR                                                                               |
| Genus <i>Jeotgalicoccus</i>              | ↑                       | NR                                                                               |
| Genus <i>Pediococcus</i>                 | ↑                       | NR                                                                               |
| Genus <i>Lactobacillus</i>               | ↓                       | Specific species reported                                                        |
| Genus <i>Enterococcus</i>                | ↓                       | NR                                                                               |
| Genus <i>Clostridium_sensu_stricto_1</i> | ↓                       | NR                                                                               |
| Genus <i>Ruminococcus</i>                | ↓                       | NR                                                                               |

Fischer. Placental colonization with periodontal pathogens: the potential missing link. Am J Obstet Gynecol 2019.

(continued)

## SUPPLEMENTAL TABLE 2

## Changes in placental microbiome in association with APOs as compared with normal for gestational weight term births (continued)

| Components of the microbiome              | LBW <sup>61</sup> | PTB <sup>57,58,a,b</sup> PTB with excess gestational weight gain <sup>59,c</sup> |
|-------------------------------------------|-------------------|----------------------------------------------------------------------------------|
| Phylum Fusobacteria                       |                   |                                                                                  |
| Genus <i>Sneathia</i>                     | ↑                 | NR                                                                               |
| Genus <i>Fusobacterium</i>                | NR                | ↑ <sup>d</sup>                                                                   |
| Phylum Proteobacteria                     |                   |                                                                                  |
| Genus <i>Lawsonia</i>                     | ↓                 | NR                                                                               |
| Phylum Proteobacteria                     |                   |                                                                                  |
| Genus <i>Beijerinckia</i>                 |                   | Direction not indicated <sup>c</sup>                                             |
| Genus <i>Burkholderia</i>                 | NR                | ↑ <sup>a,c</sup>                                                                 |
| Genus <i>Vibrio</i>                       |                   | ↑ <sup>c</sup>                                                                   |
| Phylogeny unknown                         |                   |                                                                                  |
| DSSF69_norank                             | ↑                 | NR                                                                               |
| Species                                   |                   |                                                                                  |
| Phylum Firmicutes                         |                   |                                                                                  |
| Genus <i>Lactobacillus</i>                |                   |                                                                                  |
| Species <i>Lactobacillus crispatus</i>    | NR                | ↓                                                                                |
| Species <i>Lactobacillus acidophilus</i>  | NR                | ↓                                                                                |
| Genus <i>Streptococcus</i>                |                   |                                                                                  |
| Species <i>Streptococcus thermophiles</i> | NR                | ↑                                                                                |
| Species <i>Streptococcus agalactiae</i>   | NR                | ↑ <sup>d</sup>                                                                   |
| Genus <i>Ureaplasma</i>                   |                   |                                                                                  |
| Species <i>Ureaplasma urealyticum</i>     | NR                | ↑ <sup>d</sup>                                                                   |
| Species <i>Ureaplasma parvum</i>          | NR                | ↑ <sup>d</sup>                                                                   |
| Phylum Fusobacteria                       |                   |                                                                                  |
| Genus <i>Fusobacterium</i>                |                   |                                                                                  |
| Species <i>Fusobacterium nucleatum</i>    | NR                | ↑ <sup>d</sup>                                                                   |

APO, adverse pregnancy outcome; LBW, low birthweight; NR, not reported; PTB, preterm birth.

<sup>a</sup> Preterm birth outcomes in study<sup>57</sup>; <sup>b</sup> Preterm birth outcomes in study<sup>58</sup>; <sup>c</sup> Preterm birth with excess gestational weight gain in study<sup>59</sup>; <sup>d</sup> With concurrent chorioamnionitis.

Fischer. Placental colonization with periodontal pathogens: the potential missing link. *Am J Obstet Gynecol* 2019.
